# Supplementary figures and images for: Diversification and the rate of molecular evolution: no evidence of a link in mammals
Source: Springer Nature journal article supplement (doi:10.1186/1471-2148-11-286), 2011-01-01

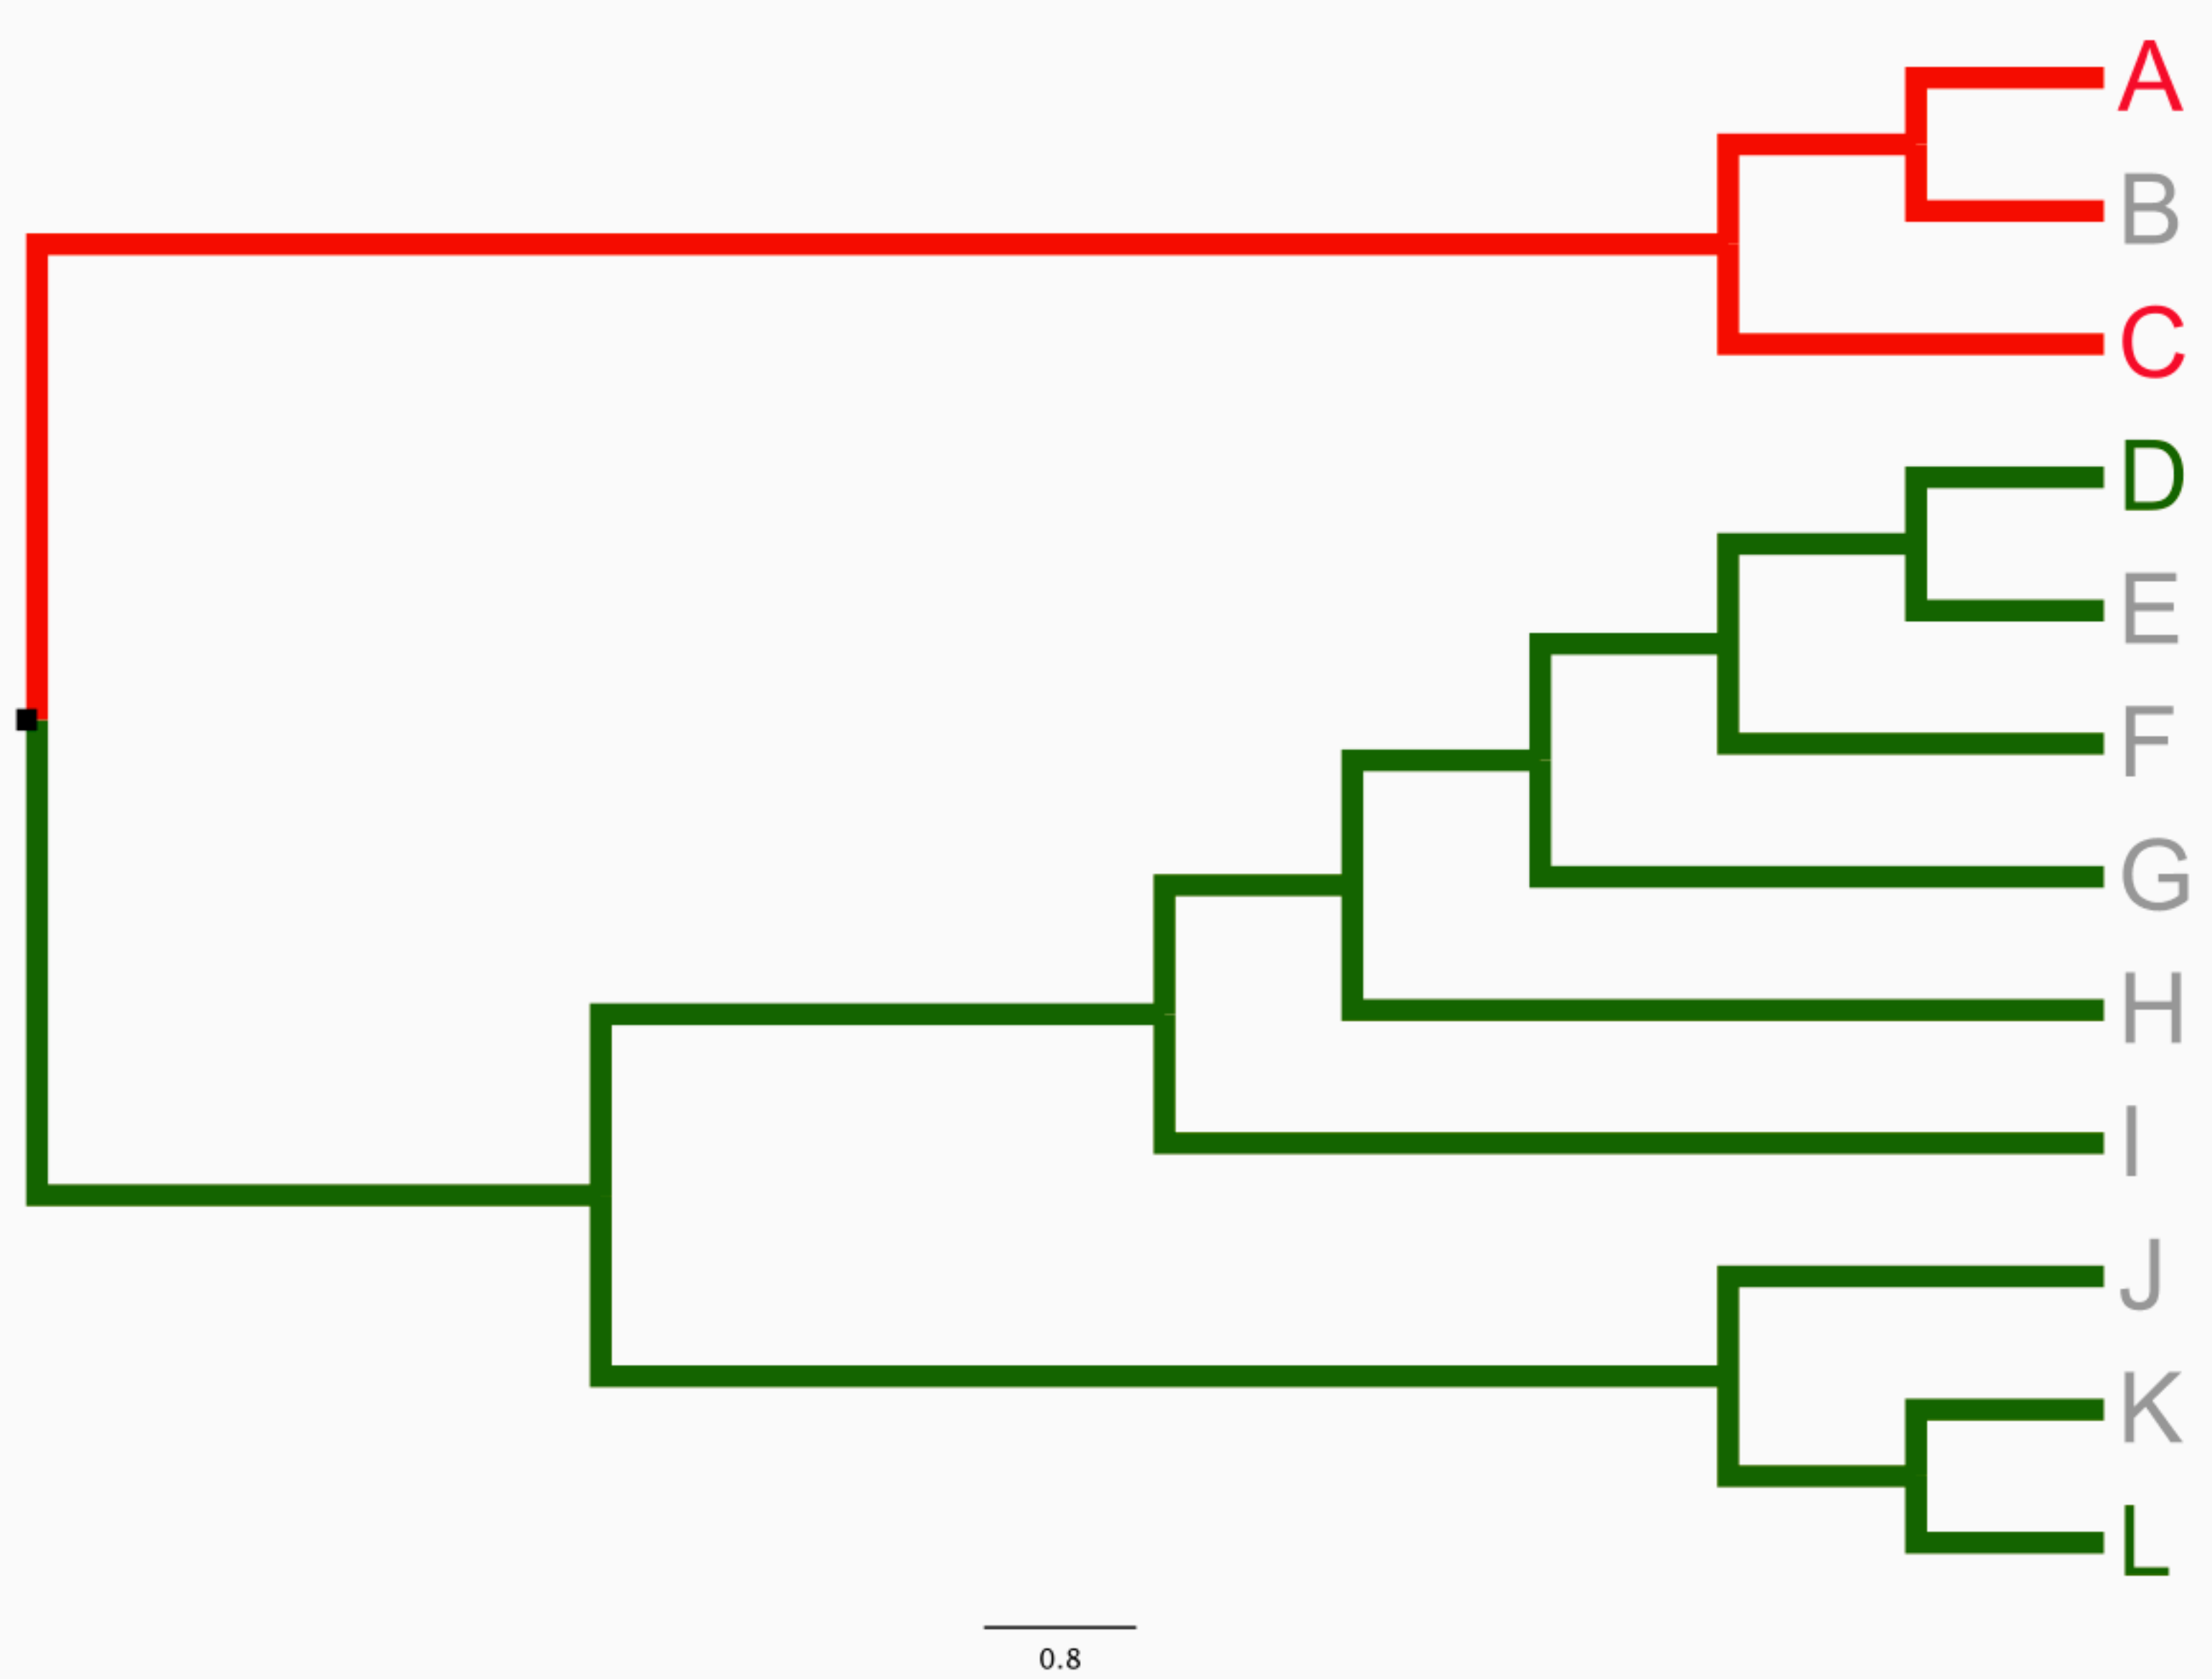

Supplement: 12862_2011_1899_MOESM6_ESM.pdf [file 12862_2011_1899_MOESM6_ESM.pdf]
